# Supplementary material for: Thermal effects of Ho:YAG laser lithotripsy during retrograde intrarenal surgery and percutaneous nephrolithotomy in an ex vivo porcine kidney model
Source: Springer Nature journal article supplement (doi:10.1007/s00345-019-02808-5), 2019-05-16
Supplement: MOESM1 [file 16728590]

| **Trial run** | **Endoscope** | **Power [W]** | **Irrigation [ml/min]** | **Fiber [µm]** | **Frequency [Hz]** |
| --- | --- | --- | --- | --- | --- |
| I | fURS + UAS | 5 | 0 /10 | 272 | 10 |
| II | fURS + UAS | 15 | 0 / 10 / 30 / 50 | 272 | 30 |
| III | fURS + UAS | 30 | 0 / 10 / 30 / 50 | 272 | 30 |
| IV | sURS + UAS | 15 | 0 / 10 / 30 / 50 | 550 | 30 |
| V | sURS + UAS | 60 | 0 / 10 / 30 / 50 | 550 | 30 |
| VI | sURS + UAS | 100 | 0 / 10 / 30 / 50 / 100 | 550 | 30 |
| VII | PNL | 15 | 0 / 10 / 30 / 50 | 940 | 30 |
| VIII | PNL | 60 | 0 / 10 / 30 / 50 | 940 | 30 |
| IX | PNL | 100 | 0 / 10 / 30 / 50 / 100 | 940 | 30 |
| X | fURS + UAS + 1g stone specimen | 15 | 0 / 10 / 30 | 272 | 30 |
| XI | fURS + UAS or sURS + UAS or PNL all with parenchymal thermocouples | 15 / 60 | 10 / 30 / 50 | 272 / 550 / 940 | 30 |

**Table 1 Overview of performed trial runs**
